# Supplementary material for: Extended Mental Health Service Utilization Among Survivors of the Oklahoma City Bombing
Source: Atypon-hosted journal article supplement (doi:10.1176/appi.ps.201200579), 2014-04-01
Supplement: 559_ds001.pdf [file 559_ds001.pdf]

**Markov Chain Methods to calculate service use patterns:** Service use patterns adapting first order forward and backward Markov Chain methods used data from all three assessments. Initial use of services was based on index study data. If the participant provided different responses on initial time of service use at different assessments, we selected data from the earliest assessment under the assumption that people's recollection is more accurate closer to the event. If index data for the initial service use were missing but follow-up data were available, we used follow-up data to construct the service use pattern. For the service duration variable, we used 7-year follow-up data, and for instances when 7-year follow-up data were missing for service duration but complete at 17-month follow-up, we used 17-month follow-up data.



**Table 1: Service use pattern by injury status**

| Types or sources of services     | Total N | Bombing-related Injuries |    |           |    | $\chi^2_{2a}$ | Bombing-related Hospitalization |     |           |    | $\chi^2_{2a}$ |
|----------------------------------|---------|--------------------------|----|-----------|----|---------------|---------------------------------|-----|-----------|----|---------------|
|                                  |         | Yes (N=86)               |    | No (N=13) |    |               | Yes (N=21)                      |     | No (N=78) |    |               |
|                                  |         | N                        | %  | N         | %  |               | N                               | %   | N         | %  |               |
| Any services                     |         |                          |    |           |    | 12.63         |                                 |     |           |    | 4.39*         |
| Yes                              | 85      | 78                       | 91 | 7         | 54 |               | 21                              | 100 | 64        | 82 |               |
| No                               | 14      | 8                        | 9  | 6         | 46 |               | 0                               | 0   | 14        | 18 |               |
| Debriefing                       |         |                          |    |           |    | 6.99**        |                                 |     |           |    | .03           |
| Yes                              | 63      | 59                       | 69 | 4         | 31 |               | 13                              | 62  | 50        | 64 |               |
| No                               | 36      | 27                       | 31 | 9         | 69 |               | 8                               | 38  | 28        | 36 |               |
| Support group                    |         |                          |    |           |    | 3.29          |                                 |     |           |    | 1.22          |
| Yes                              | 46      | 43                       | 50 | 3         | 23 |               | 12                              | 57  | 34        | 44 |               |
| No                               | 53      | 43                       | 50 | 10        | 77 |               | 9                               | 43  | 44        | 56 |               |
| Religious leader                 |         |                          |    |           |    | .14           |                                 |     |           |    | 1.51          |
| Yes                              | 19      | 17                       | 20 | 2         | 15 |               | 6                               | 29  | 13        | 17 |               |
| No                               | 80      | 69                       | 80 | 11        | 85 |               | 15                              | 71  | 65        | 83 |               |
| Psychiatrist                     |         |                          |    |           |    | 2.17*         |                                 |     |           |    | 6.80**        |
| Yes                              | 33      | 31                       | 36 | 2         | 15 |               | 12                              | 57  | 21        | 27 |               |
| No                               | 66      | 55                       | 64 | 11        | 85 |               | 9                               | 43  | 57        | 73 |               |
| Other mental health professional |         |                          |    |           |    | 6.83**        |                                 |     |           |    | 4.17*         |
| Yes                              | 56      | 53                       | 62 | 3         | 23 |               | 16                              | 76  | 40        | 51 |               |
| No                               | 43      | 33                       | 38 | 10        | 77 |               | 5                               | 24  | 38        | 49 |               |
| Family doctor                    |         |                          |    |           |    | .20           |                                 |     |           |    | 1.46          |
| Yes                              | 36      | 32                       | 37 | 4         | 31 |               | 10                              | 48  | 26        | 33 |               |
| No                               | 63      | 54                       | 63 | 9         | 69 |               | 11                              | 52  | 52        | 67 |               |

Notes:

<sup>a</sup> df=1

\* and \*\* represent p&lt;.05 and p&lt;.01, respectively.

Table 2: Service receipt pattern and psychiatric disorders

| Type or source of mental health services                     | Service received? | Bombing-related PTSD |    |                            | Postdisaster Major Depression |    |                            |
|--------------------------------------------------------------|-------------------|----------------------|----|----------------------------|-------------------------------|----|----------------------------|
|                                                              |                   | Yes                  | No |                            | Yes                           | No |                            |
| Any services                                                 | Yes (n=85)        | 41                   | 44 | Fisher Exact<br>p=0.0034   | 40                            | 45 | Fisher Exact<br>P=0.0380   |
|                                                              | No (n=14)         | 1                    | 13 |                            | 2                             | 12 |                            |
| Debriefing for victims                                       | Yes (n=63)        | 28                   | 35 | $\chi^2=0.29$<br>P=0.5906  | 27                            | 36 | $\chi^2=0.01$<br>P=0.9082  |
|                                                              | No (n=36)         | 14                   | 22 |                            | 15                            | 21 |                            |
| Support group (survivors and other established)              | Yes (n=46)        | 24                   | 22 | $\chi^2=6.91$<br>P=0.0086  | 29                            | 17 | $\chi^2=14.96$<br>P=0.0001 |
|                                                              | No (n=53)         | 14                   | 39 |                            | 13                            | 40 |                            |
| Religious leader (pastor, minister, chaplain, rabbi, priest) | Yes (n=19)        | 13                   | 6  | $\chi^2=6.51$<br>P=0.0108  | 13                            | 6  | $\chi^2=6.51$<br>P=0.0108  |
|                                                              | No (n=80)         | 29                   | 51 |                            | 29                            | 51 |                            |
| Psychiatrist                                                 | Yes (n=33)        | 21                   | 12 | $\chi^2=9.12$<br>P=0.0025  | 22                            | 11 | $\chi^2=11.91$<br>P=0.0006 |
|                                                              | No (n=66)         | 21                   | 45 |                            | 20                            | 46 |                            |
| Other mental health professional                             | Yes (n=56)        | 33                   | 23 | $\chi^2=14.38$<br>P=0.0001 | 33                            | 23 | $\chi^2=14.38$<br>P=0.0001 |
|                                                              | No (n=43)         | 9                    | 34 |                            | 9                             | 34 |                            |
| Family doctor                                                | Yes (n=36)        | 18                   | 18 | $\chi^2=1.33$<br>P=0.2489  | 19                            | 17 | $\chi^2=2.48$<br>P=0.1151  |
|                                                              | No (n=63)         | 24                   | 39 |                            | 23                            | 40 |                            |

Table 3: When service use started

| Type or source of mental health service                             | Within 2 weeks | 2 weeks-1 month | 1-6 months | 6 months-1 year | After 1 year |
|---------------------------------------------------------------------|----------------|-----------------|------------|-----------------|--------------|
| Debriefing (n=63)                                                   | 34             | 10              | 19         | 0               | 0            |
| Support group (survivors and other established) (n=46)              | 19             | 5               | 16         | 6               | 0            |
| Religious leader (pastor, minister, chaplain, rabbi, priest) (n=19) | 13             | 1               | 3          | 2               | 0            |
| Psychiatrist (n=33)                                                 | 5              | 7               | 11         | 4               | 6            |
| Other mental health professional (n=56)                             | 10             | 13              | 25         | 6               | 2            |
| Family doctor (n=36)                                                | 11             | 6               | 16         | 3               | 0            |
| Any of the Above (n = 87)                                           | 56             | 12              | 17         | 0               | 1            |

**Table 4: Duration of service use\***

|                                                                            | <b>Less than 2 weeks</b> | <b>2 weeks-1 month</b> | <b>1-6 months</b> | <b>6 months-1 year</b> | <b>Longer than 1 year</b> | <b>Still attending at 7 years</b> |
|----------------------------------------------------------------------------|--------------------------|------------------------|-------------------|------------------------|---------------------------|-----------------------------------|
| <b>Support group (survivors and other established) (n=46)</b>              | 1                        | 5                      | 15                | 4                      | 9                         | 0                                 |
| <b>Religious leader (pastor, minister, chaplain, rabbi, priest) (n=19)</b> | 2                        | 0                      | 3                 | 3                      | 7                         | 1                                 |
| <b>Psychiatrist (n=33)</b>                                                 | 1                        | 3                      | 4                 | 2                      | 6                         | 4                                 |
| <b>Other mental health professional (n=56)</b>                             | 1                        | 6                      | 18                | 6                      | 17                        | 3                                 |
| <b>Family doctor (n=36)</b>                                                | 5                        | 3                      | 8                 | 2                      | 5                         | 1                                 |
| <b>Any of the Above (n=65)</b>                                             | 3                        | 8                      | 15                | 6                      | 26                        | 7                                 |

\*Some responses missing

\*1 participant is still attending a psychiatrist, other mental health professional, and a family doctor.
